# Supplementary material for: Differential whole-genome doubling and homologous recombination deficiencies across breast cancer subtypes from the Taiwanese population
Source: PubMed Central journal article supplement (PMC8429690; doi:10.1038/s42003-021-02597-x), 2021-09-09
Supplement: 42003_2021_2597_MOESM3_ESM.pdf [file 42003_2021_2597_MOESM3_ESM.pdf]

## **Description of Additional Supplementary Files**

**Supplementary Data 1:** The number of indels called in each sample

**Supplementary Data 2:** Sequencing and sample quality metric for whole-genome doubling samples

**Supplementary Data 3:** The bootstrapping data for 95% confidence interval of mutational frequencies in each population
